# Supplementary material for: Enhanced environmental remediation through hybrid adsorption-photocatalysis using ZnO/TiO 2 -CaAlg composite catalysts
Source: Royal Society of Chemistry journal article supplement (doi:10.1039/d5ra09465h), 2026-01-01
Supplement: d5ra09465h1.pdf [file d5ra09465h1.pdf]

**Table S1.** Kinetics, isotherm models and equations used for thermodynamic analysis.

| models                             | Formula                                                          | Parameters                                                                                                                                                         | Eqs  |
|------------------------------------|------------------------------------------------------------------|--------------------------------------------------------------------------------------------------------------------------------------------------------------------|------|
| PFO                                | $\ln \left( \frac{C_0}{C_t} \right) = k_1 t$                     | $C_0$ and $C_t$ (mg/L): initial and current concentration of CV.<br>$k_1$ ( $\text{min}^{-1}$ ): photodegradation rate constant of PFO model.                      | (5)  |
| PSO                                | $\frac{1}{C_t} - \frac{1}{C_0} = k_2 t$                          | $k_2$ (L/mg.min): photodegradation rate constant of PSO model.                                                                                                     | (6)  |
| Langmuir                           | $q_e = (q_{\max} K_L C_e) / (1 + K_L C_e)$                       | $C_e$ (mg/L): equilibrium concentration of the resting CV dye in solution.<br>$q_{\max}$ (mg/g): maximum adsorption capacity.<br>$K_L$ (L/mg) : Langmuir constant. | (7)  |
| Freundlich                         | $q_e = K_F C_e^{1/n}$                                            | $K_F$ (mg/g): Freundlich constant.<br>$n$ : heterogeneity factor.                                                                                                  | (8)  |
| Distribution coefficient ( $K_d$ ) | $K_d = \frac{q_e}{C_e}$                                          | $q_e$ (mg/g): adsorption capacity at equilibrium.<br>$C_e$ (mg/L): equilibrium concentration of the resting CV dye.                                                | (9)  |
| Free enthalpy ( $\Delta G^\circ$ ) | $\Delta G^\circ = -RT \ln K_d$                                   | $R$ ( $\sim 8.314$ J/mol.K): the universal constant of gasses.<br>$T$ ( $^\circ\text{K}$ ): the absolute temperature.                                              | (10) |
| Linear fit (Van 't Hoff law)       | $\ln K_d = \frac{\Delta S^\circ}{R} - \frac{\Delta H^\circ}{RT}$ | $\Delta S^\circ$ (J/mol.K): standard entropy<br>$\Delta H^\circ$ (kJ/mol): standard enthalpy                                                                       | (11) |

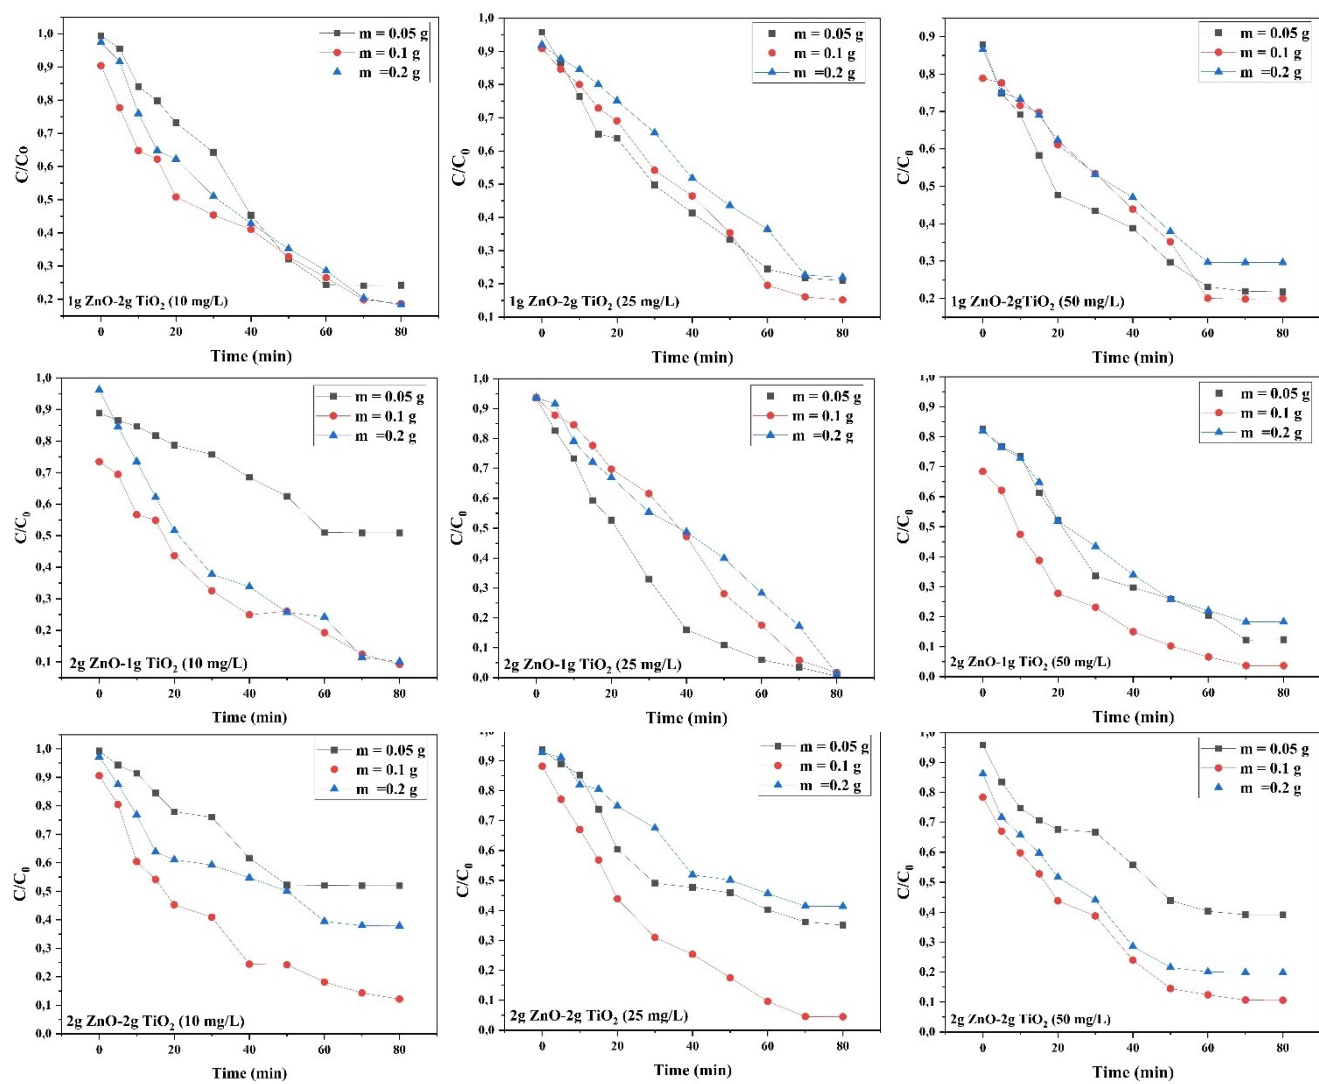

**Figure S1.** Impact of initial CV dye concentration on its removal over time using three different ZnO/TiO<sub>2</sub>-CaAlg nanoparticles.

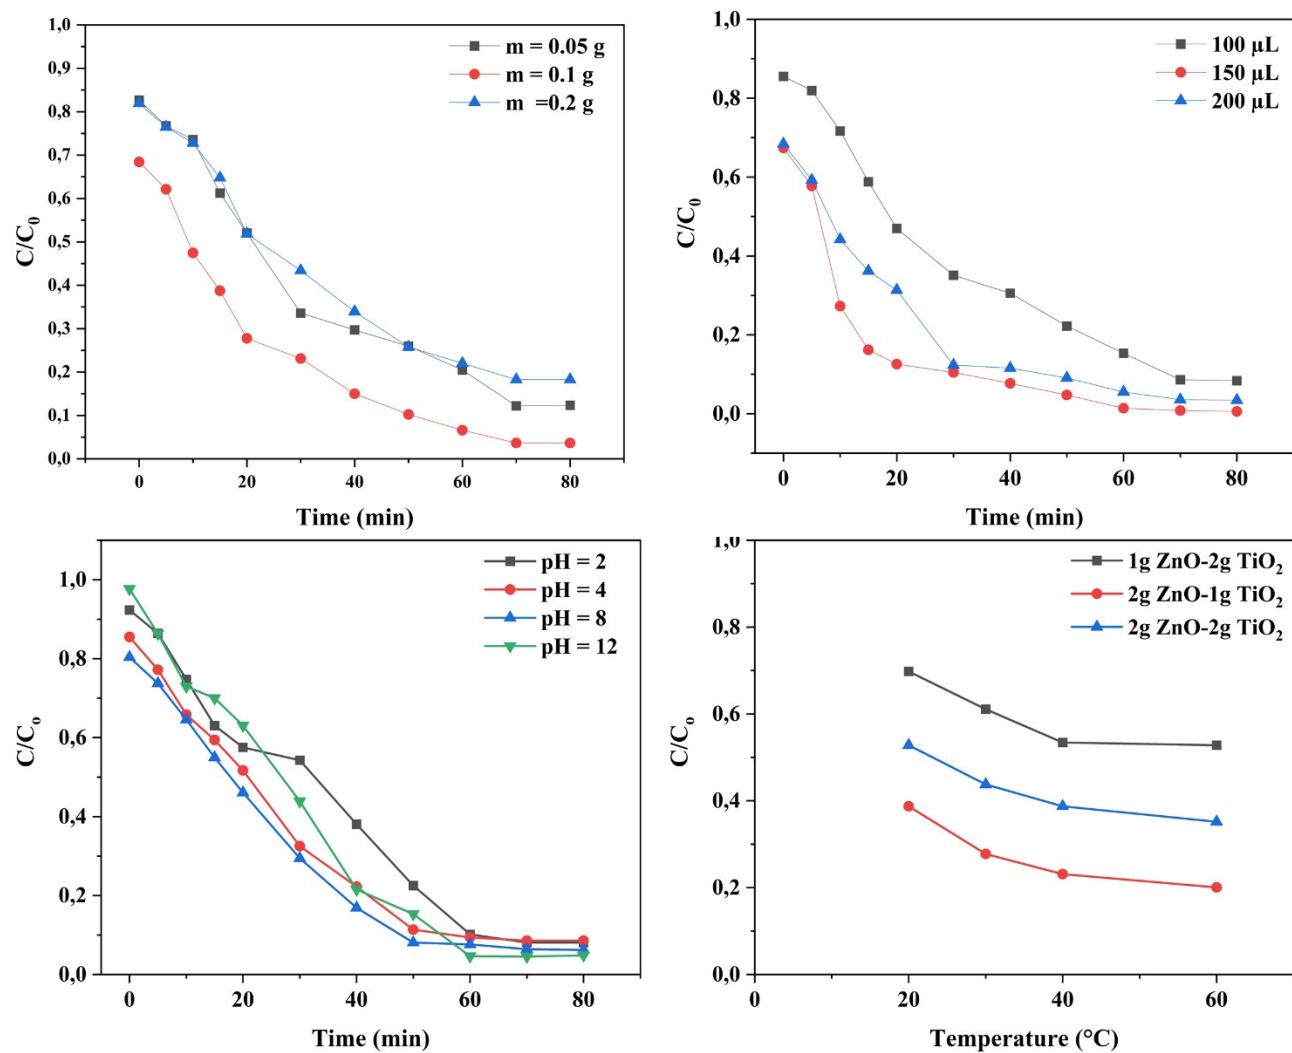

**Figure S2.** Effects of operating parameters (catalyst mass,  $H_2O_2$  volume, pH, and temperature) on the adsorption/photocatalytic degradation of CV dye using 2 g ZnO/1 g  $TiO_2$ -CaAlg. ( $V_{\text{solution}} = 300$  ml,  $C_{\text{solution}} = 50$  ppm,  $t = 70$  min)

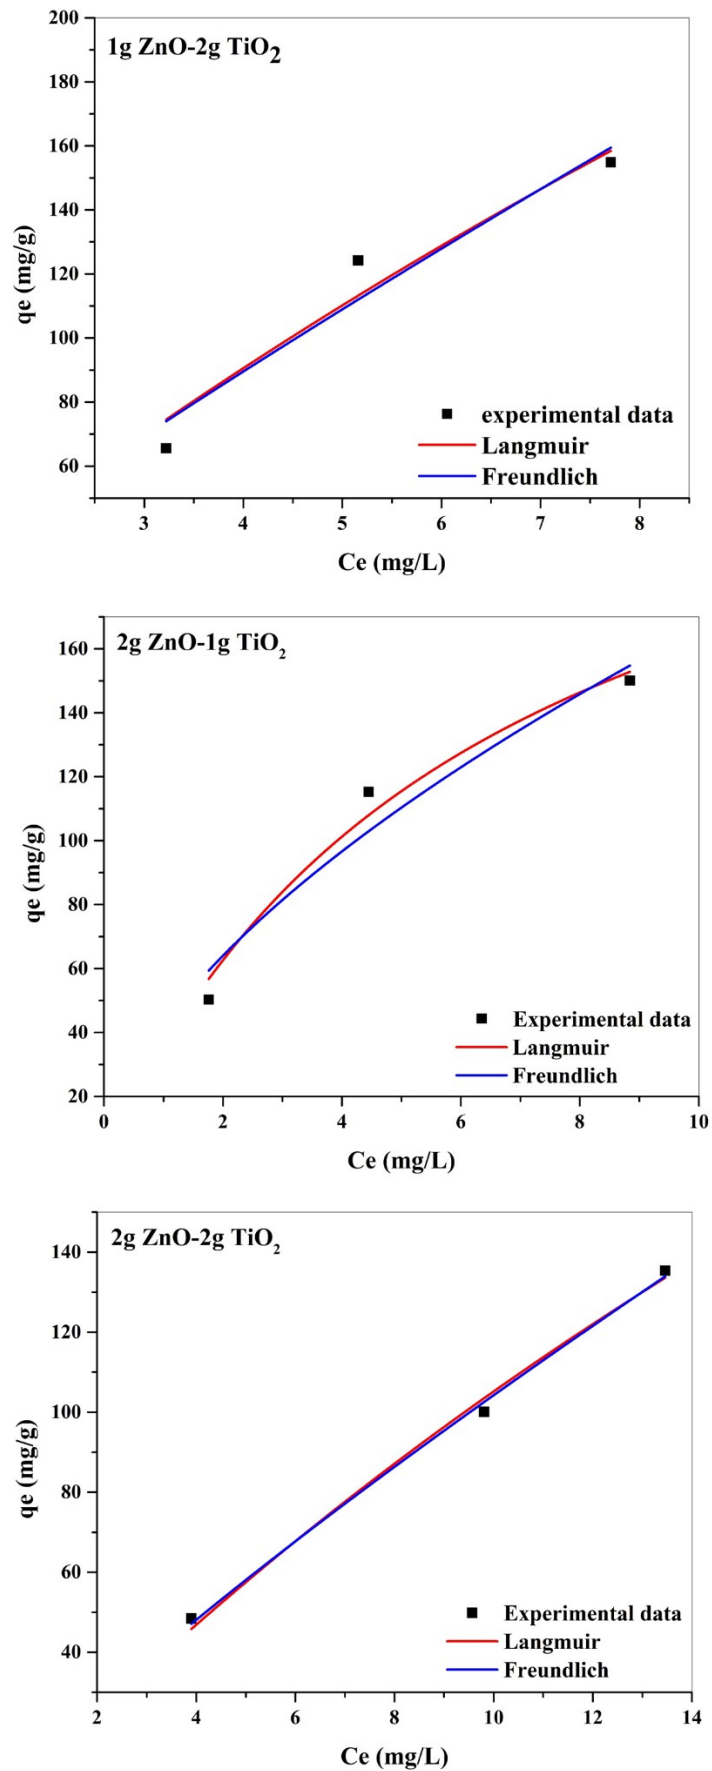

**Figure S3.** Isotherm modeling of adsorption/ photocatalytic degradation of CV dye.

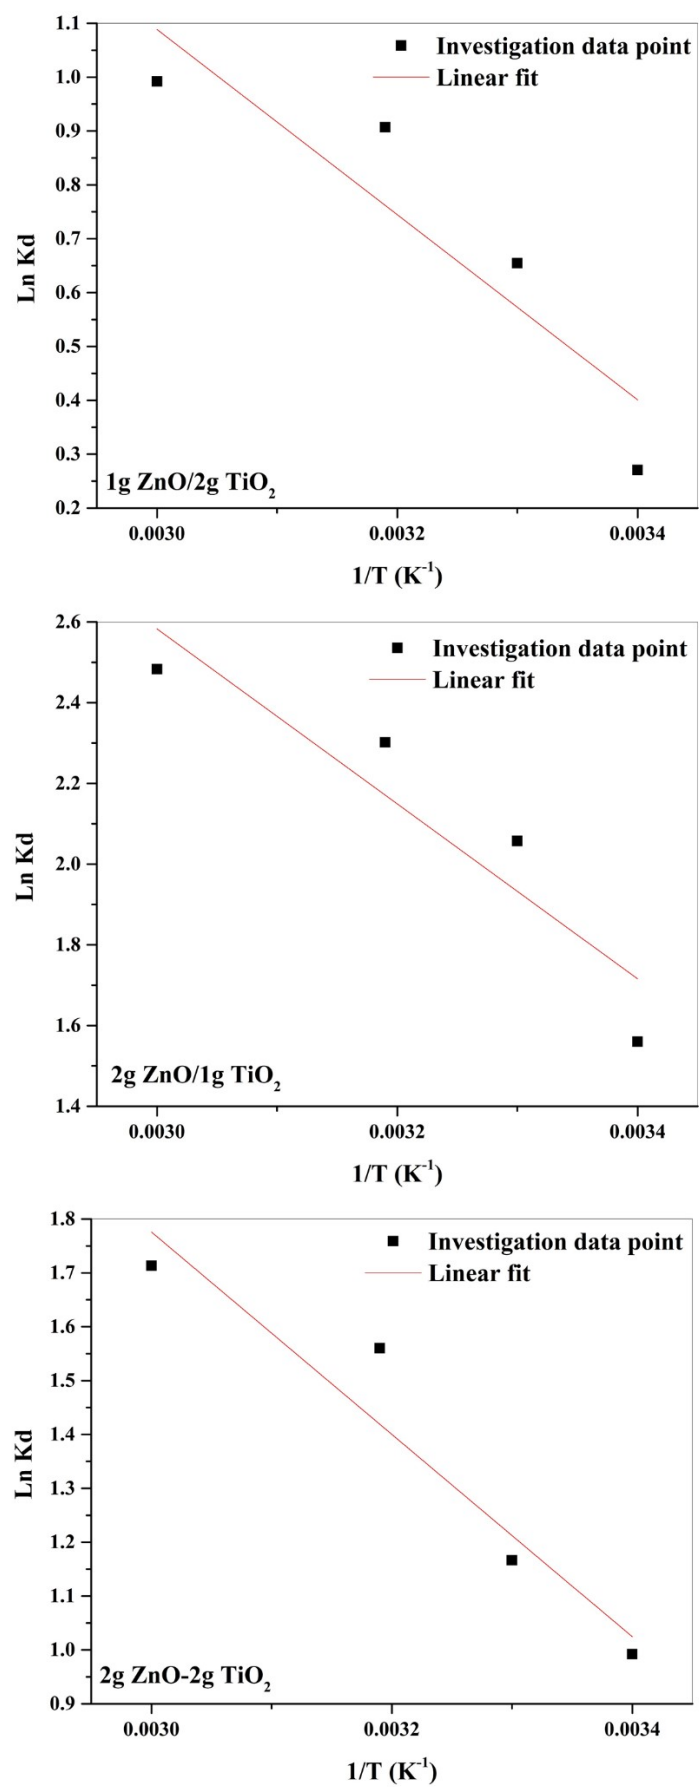

**Figure S4.** Van't Hoff plots.
